# Supplementary material for: Depth of response is a significant predictor for long-term outcome in advanced gastric cancer patients treated with trastuzumab
Source: PubMed Central journal article supplement (PMC5458198; doi:10.18632/oncotarget.16099), 2017-03-10
Supplement: oncotarget-08-31169-s001.pdf [file oncotarget-08-31169-s001.pdf]

## Depth of response is a significant predictor for long-term outcome in advanced gastric cancer patients treated with trastuzumab

### Supplementary Materials

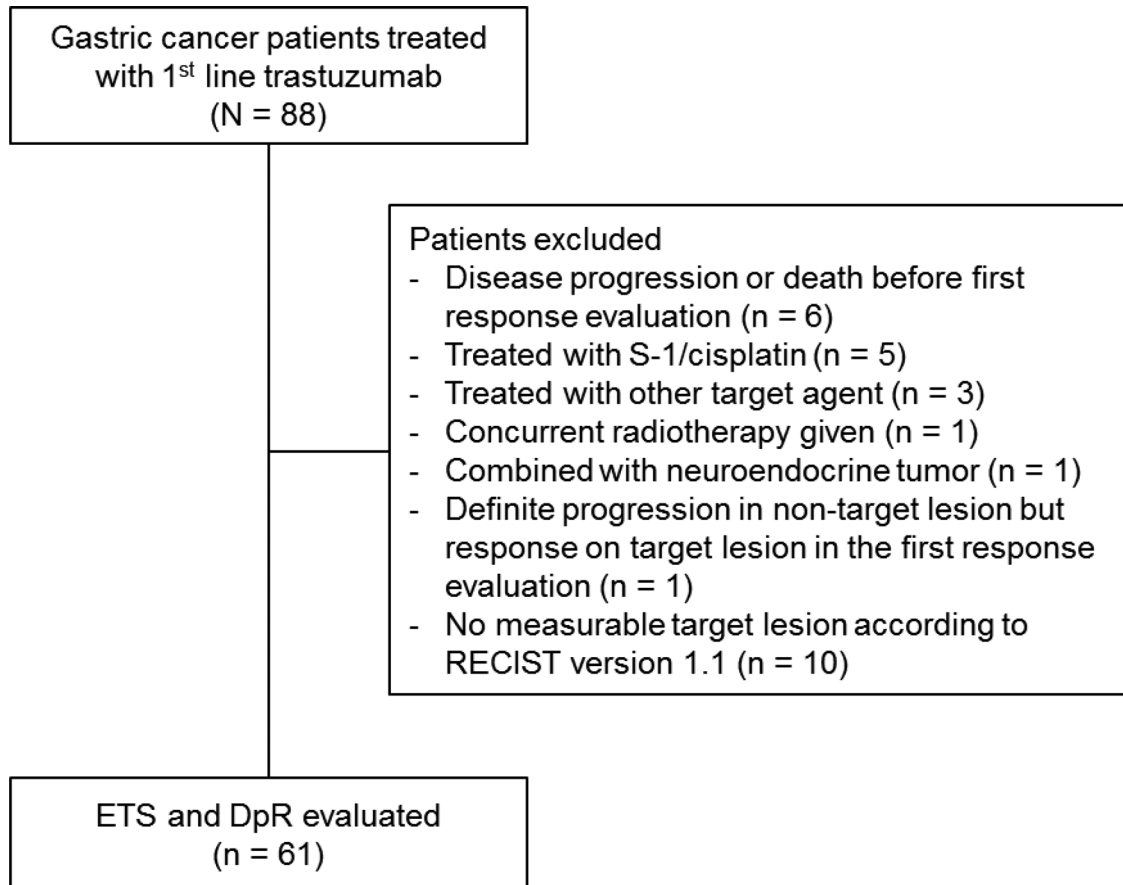

**Supplementary Figure 1: Study flow diagram.** RECIST, Response Evaluation Criteria in Solid Tumors; ETS, early tumor shrinkage; DpR, depth of response; PPS, Post-progression survival.

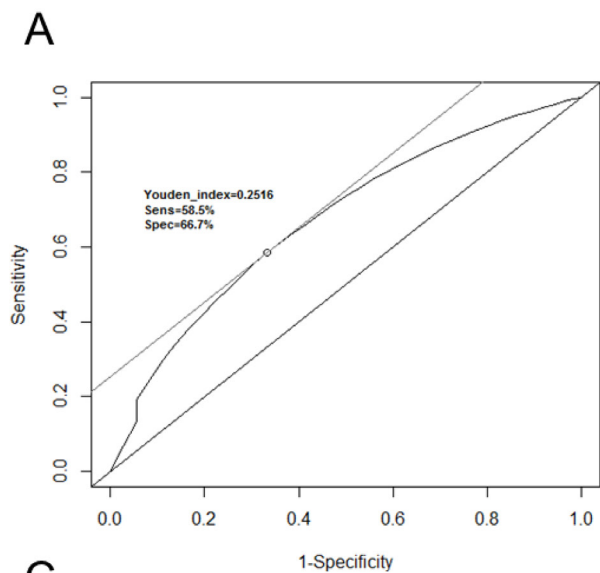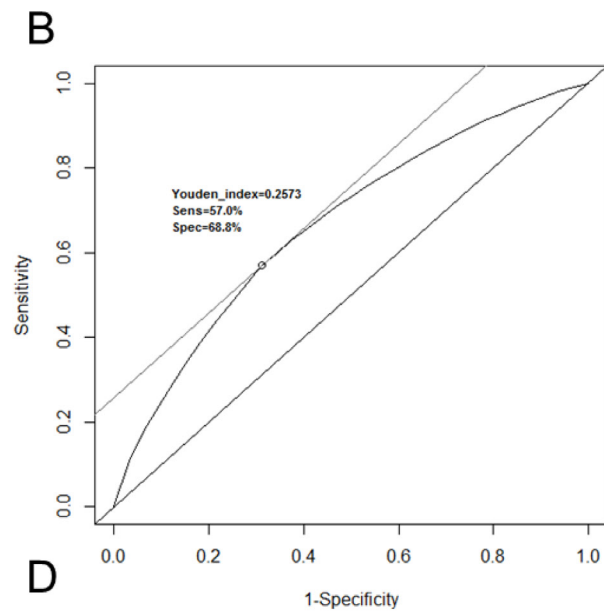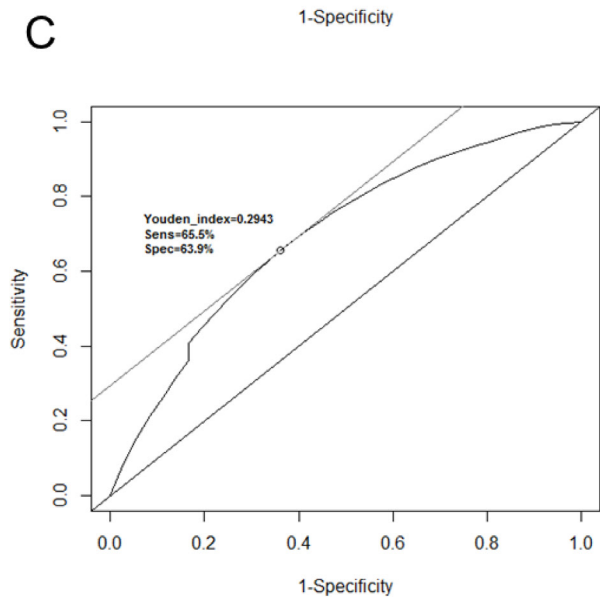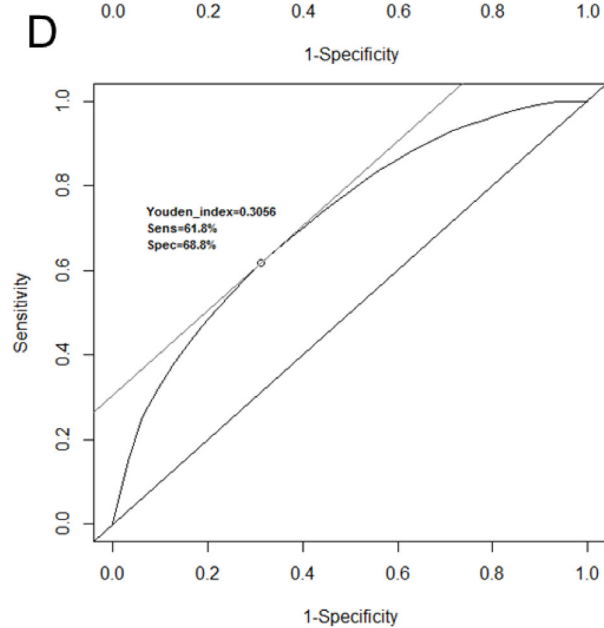

**Supplementary Figure 2: ROC curves of DpR (C, D) and ETS (A, B) depicting the Youden's J index and optimal cutoff point for PFS (A, C) or OS (B, D) ETS, early tumor shrinkage; DpR, depth of response; PFS, progression-free survival; OS, overall survival.**

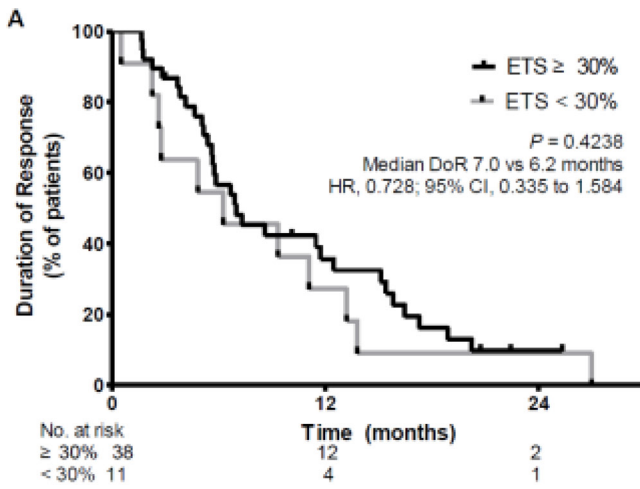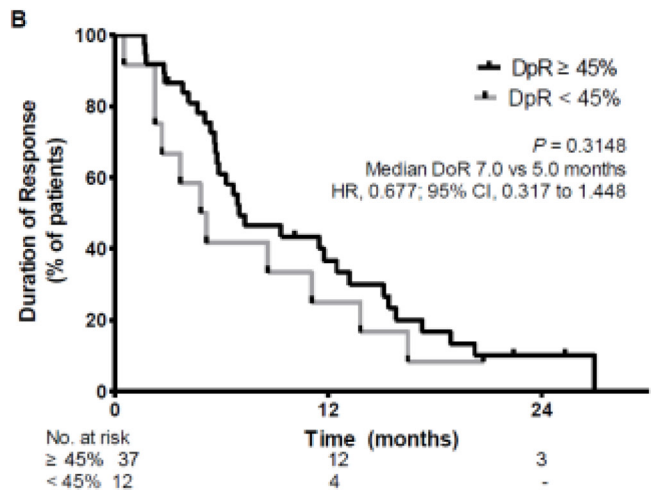

Supplementary Figure 3: Duration of Response comparing patients who reached ETS and DpR cut off values or not.

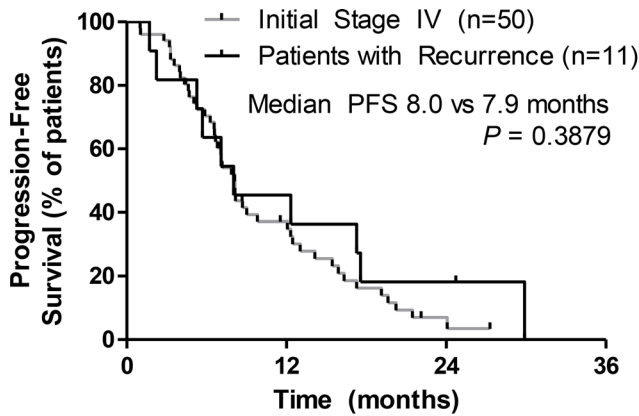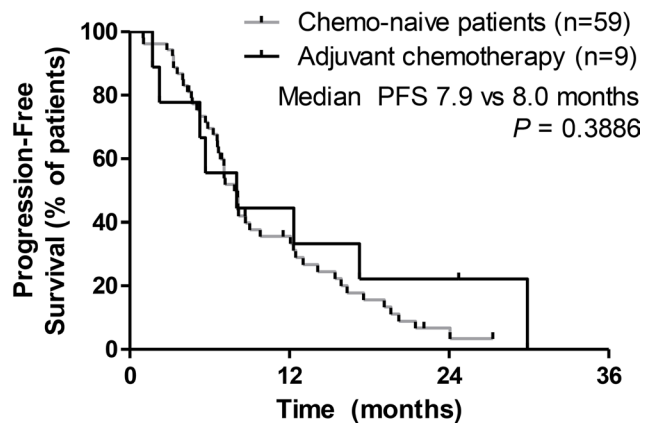

Supplementary Figure 4: Progression-free survival based on recurrence or adjuvant chemotherapy.

**Supplementary Table 1: Univariate analysis of selected demographic variables for survival**

|                                   | Progression-free Survival |                |                   | Overall Survival |                |                   |
|-----------------------------------|---------------------------|----------------|-------------------|------------------|----------------|-------------------|
|                                   | HR                        | 95% CI         | P                 | HR               | 95% CI         | P                 |
| Sex                               |                           |                |                   |                  |                |                   |
| Female                            | Ref                       |                |                   | Ref              |                |                   |
| Male                              | 1.272                     | 0.717 to 2.256 | 0.410             | 1.108            | 0.540 to 2.275 | 0.779             |
| Age                               |                           |                |                   |                  |                |                   |
| < 65                              | Ref                       |                |                   | Ref              |                |                   |
| ≥ 65                              | 1.001                     | 0.573 to 1.752 | 0.996             | 1.183            | 0.590 to 2.373 | 0.635             |
| ECOG performance status           |                           |                |                   |                  |                |                   |
| 0                                 | Ref                       |                |                   | Ref              |                |                   |
| ≥ 1                               | 1.887                     | 1.090 to 3.267 | <b>0.023</b>      | 2.578            | 1.280 to 5.192 | <b>0.008</b>      |
| HER2 overexpression by IHC        |                           |                |                   |                  |                |                   |
| 2+                                | Ref                       |                |                   | Ref              |                |                   |
| 3+                                | 0.428                     | 0.232 to 0.792 | <b>0.007</b>      | 0.673            | 0.327 to 1.385 | 0.282             |
| HER2/CEP17 ratio by SISH or FISH* |                           |                |                   |                  |                |                   |
| 2.0–4.69                          | Ref                       |                |                   | Ref              |                |                   |
| ≥ 4.7                             | 0.461                     | 0.191 to 1.110 | 0.084             | 1.047            | 0.414 to 2.651 | 0.922             |
| Metastasis                        |                           |                |                   |                  |                |                   |
| Lymph node                        | 0.877                     | 0.458 to 1.678 | 0.692             | 0.764            | 0.354 to 1.646 | 0.491             |
| Liver                             | 1.129                     | 0.653 to 1.952 | 0.664             | 1.508            | 0.768 to 2.964 | 0.233             |
| Peritoneum                        | 1.260                     | 0.689 to 2.303 | 0.453             | 1.423            | 0.693 to 2.922 | 0.337             |
| Lung                              | 0.741                     | 0.322 to 1.653 | 0.464             | 1.105            | 0.427 to 2.861 | 0.837             |
| Bone                              | 2.099                     | 0.812 to 5.423 | 0.126             | 0.744            | 0.225 to 2.459 | 0.628             |
| Chemotherapy regimen              |                           |                |                   |                  |                |                   |
| Herceptin + FP                    | Ref                       |                |                   | Ref              |                |                   |
| Herceptin + XP                    | 0.787                     | 0.369 to 1.681 | 0.536             | 1.310            | 0.460 to 2.861 | 0.613             |
| Second Line Chemotherapy          |                           |                |                   |                  |                |                   |
| No                                | Ref                       |                |                   | Ref              |                |                   |
| Yes                               | 1.607                     | 0.898 to 2.879 | 0.110             | 0.896            | 0.427 to 1.881 | 0.772             |
| ETS†                              | 0.839                     | 0.745 to 0.945 | <b>0.004</b>      | 0.847            | 0.745 to 0.962 | <b>0.010</b>      |
| TTG                               | 0.995                     | 0.992 to 0.998 | <b>0.002</b>      | 0.994            | 0.989 to 0.999 | <b>0.010</b>      |
| DpR†                              | 0.763                     | 0.682 to 0.853 | <b>&lt; 0.001</b> | 0.804            | 0.723 to 0.894 | <b>&lt; 0.001</b> |

\*total 22 patients were assessed for SISH or FISH.† HR per 10% tumor size decrease Abbreviations : HR, hazard ratio; CI, confidence interval; Ref, Reference; ECOG, Eastern Cooperative Oncology Group; HER2, human epidermal growth factor receptor 2; IHC, immunohistochemistry; CEP17, chromosome 17 centromere; SISH, silver in situ hybridization; FISH, fluorescence in situ hybridization; FP, 5-FU+Cisplatin; XP, Xeloda+Cisplatin; ETS, early tumor shrinkage; TTG, time to tumor growth; DpR, depth of response.

**Supplementary Table 2: Multivariable analysis of selected demographic variables**

|                            | Progression-free Survival |                |                    | Overall Survival        |                 |               |
|----------------------------|---------------------------|----------------|--------------------|-------------------------|-----------------|---------------|
|                            | Adjusted for Covariates   |                |                    | Adjusted for Covariates |                 |               |
|                            | HR                        | 95% CI         | P                  | HR                      | 95% CI          | P             |
| Age                        |                           |                |                    |                         |                 |               |
| < 65                       | Ref                       |                |                    | Ref                     |                 |               |
| ≥ 65                       | 0.678                     | 0.354 to 1.300 | 0.242              | 1.041                   | 0.502 to 2.160  | 0.915         |
| Sex                        |                           |                |                    |                         |                 |               |
| Female                     | Ref                       |                |                    | Ref                     |                 |               |
| Male                       | 1.539                     | 0.833 to 2.842 | 0.168              | 1.433                   | 0.661 to 3.107  | 0.362         |
| HER2 overexpression by IHC |                           |                |                    |                         |                 |               |
| 2+                         | Ref                       |                |                    | Ref                     |                 |               |
| 3+                         | 0.490                     | 0.259 to 0.931 | <b>0.029</b>       | 1.017                   | 0.455 to 2.272  | 0.970         |
| ECOG performance status    |                           |                |                    |                         |                 |               |
| 0                          | Ref                       |                |                    | Ref                     |                 |               |
| ≥ 1                        | 1.883                     | 0.999 to 3.547 | 0.050              | 2.573                   | 1.215 to 5.450  | <b>0.014</b>  |
| Regimen                    |                           |                |                    |                         |                 |               |
| Herceptin + FP             | Ref                       |                |                    | Ref                     |                 |               |
| Herceptin + XP             | 0.545                     | 0.236 to 1.262 | 0.157              | 1.517                   | 0.503 to 4.577  | 0.459         |
| ETS <sup>†</sup>           | 0.850                     | 0.754 to 0.959 | <b>0.008</b>       | 0.854                   | 0.733 to 0.996  | <b>0.044</b>  |
| Age                        |                           |                |                    |                         |                 |               |
| < 65                       | Ref                       |                |                    | Ref                     |                 |               |
| ≥ 65                       | 0.715                     | 0.381 to 1.340 | 0.295              | 1.159                   | 0.559 to 2.402  | 0.692         |
| Sex                        |                           |                |                    |                         |                 |               |
| Female                     | Ref                       |                |                    | Ref                     |                 |               |
| Male                       | 1.340                     | 0.718 to 2.504 | 0.358              | 1.277                   | 0.5778 to 2.825 | 0.545         |
| HER2 overexpression by IHC |                           |                |                    |                         |                 |               |
| 2+                         | Ref                       |                |                    | Ref                     |                 |               |
| 3+                         | 0.579                     | 0.302 to 1.110 | 0.100              | 1.543                   | 0.666 to 3.578  | 0.312         |
| ECOG performance status    |                           |                |                    |                         |                 |               |
| 0                          | Ref                       |                |                    | Ref                     |                 |               |
| ≥ 1                        | 1.479                     | 0.766 to 2.854 | 0.244              | 2.155                   | 0.990 to 4.691  | <b>0.053</b>  |
| Regimen                    |                           |                |                    |                         |                 |               |
| Herceptin + FP             | Ref                       |                |                    | Ref                     |                 |               |
| Herceptin + XP             | 0.593                     | 0.259 to 1.356 | 0.215              | 2.345                   | 0.720 to 7.646  | 0.157         |
| DpR <sup>†</sup>           | 0.787                     | 0.698 to 0.888 | <b>&lt; 0.0001</b> | 0.765                   | 0.659 to 0.888  | <b>0.0004</b> |

<sup>†</sup>HR per 10% tumor size decrease.

Abbreviations : HR, hazard ratio; CI, confidence interval; Ref, Reference; ECOG, Eastern Cooperative Oncology Group; HER2, human epidermal growth factor receptor 2; IHC, immunohistochemistry; FP, 5FU+Cisplatin; XP, Capecitabine+Cisplatin; ETS, early tumor shrinkage; TTG, time to tumor growth; DpR, depth of response.

**Supplementary Table 3: Comparison of clinicopathologic features of patients categorized by cutoff value on ETS or DpR (N = 61). See Supplementary\_Table\_3**

**Supplementary Table 4: Univariate analysis of selected demographic variables of patients who had undergone second chemotherapy (N = 37) and their relation to post progression survival**

|                                   | Post Progression Survival |                |              |
|-----------------------------------|---------------------------|----------------|--------------|
|                                   | HR                        | 95% CI         | P            |
| Sex                               |                           |                |              |
| Female                            | Ref                       |                |              |
| Male                              | 0.872                     | 0.601 to 2.106 | 0.760        |
| Age                               |                           |                |              |
| < 65                              | Ref                       |                |              |
| ≥ 65                              | 0.716                     | 0.295 to 1.735 | 0.459        |
| ECOG performance status           |                           |                |              |
| 0                                 | Ref                       |                |              |
| ≥ 1                               | 1.704                     | 0.755 to 3.846 | 0.199        |
| HER2 overexpression by IHC        |                           |                |              |
| 2+                                | Ref                       |                |              |
| 3+                                | 1.102                     | 0.470 to 2.580 | 0.824        |
| HER2/CEP17 ratio by SISH or FISH* |                           |                |              |
| 2.0–4.69                          | Ref                       |                |              |
| ≥ 4.7                             | 1.442                     | 0.493 to 4.218 | 0.504        |
| Metastasis                        |                           |                |              |
| Lymph node                        | 0.520                     | 0.222 to 1.220 | 0.133        |
| Liver                             | 2.060                     | 0.916 to 4.631 | 0.080        |
| Peritoneum                        | 0.863                     | 0.356 to 2.091 | 0.744        |
| Lung                              | 1.635                     | 0.552 to 4.838 | 0.375        |
| Bone                              | 0.540                     | 0.159 to 1.840 | 0.325        |
| Chemotherapy regimen              |                           |                |              |
| Herceptin + FP                    | Ref                       |                |              |
| Herceptin + XP                    | 2.180                     | 0.469 to 3.806 | 0.588        |
| ETS†                              | 1.073                     | 0.810 to 1.072 | 0.325        |
| TTG                               | 0.995                     | 0.989 to 1.001 | 0.130        |
| DpR†                              | 0.884                     | 0.784 to 0.998 | <b>0.046</b> |

\*total 17 patients were assessed for SISH or FISH.

†HR per 10% tumor size decrease.

Abbreviations : HR, hazard ratio; CI, confidence interval; Ref, Reference; ECOG, Eastern Cooperative Oncology Group; HER2, human epidermal growth factor receptor 2; IHC, immunohistochemistry; CEP17, chromosome 17 centromere; SISH, silver in situ hybridization; FISH, fluorescence in situ hybridization; FP, 5-FU+Cisplatin; XP, Xeloda+Cisplatin; ETS, early tumor shrinkage; TTG, time to tumor growth; DpR, deepness of response.

**Supplementary Table 5: Multivariable analysis of selected demographic variables of patients who had undergone second chemotherapy (N = 37) and their relation to post progression survival**

| Post Progression Survival  |       |                |              |
|----------------------------|-------|----------------|--------------|
| Adjusted for Covariates    |       |                |              |
|                            | HR    | 95% CI         | P            |
| Age                        |       |                |              |
| < 65                       | Ref   |                |              |
| ≥ 65                       | 0.733 | 0.298 to 1.801 | 0.498        |
| ECOG performance status    |       |                |              |
| 0                          | Ref   |                |              |
| ≥ 1                        | 1.591 | 0.679 to 3.728 | 0.268        |
| HER2 overexpression by IHC |       |                |              |
| 2+                         | Ref   |                |              |
| 3+                         | 1.760 | 0.618 to 5.008 | 0.290        |
| ETS <sup>†</sup>           | 0.910 | 0.763 to 1.084 | 0.289        |
| Age                        |       |                |              |
| < 65                       | Ref   |                |              |
| ≥ 65                       | 1.002 | 0.379 to 2.654 | 0.997        |
| ECOG performance status    |       |                |              |
| 0                          | Ref   |                |              |
| ≥ 1                        | 1.276 | 0.498 to 3.271 | 0.611        |
| HER2 overexpression by IHC |       |                |              |
| 2+                         | Ref   |                |              |
| 3+                         | 2.977 | 0.960 to 9.236 | 0.059        |
| TTG                        | 0.997 | 0.989 to 1.006 | 0.459        |
| DpR <sup>†</sup>           | 0.844 | 0.712 to 0.999 | <b>0.049</b> |

<sup>†</sup>HR per 10% tumor size decrease.

Abbreviations : HR, hazard ratio; CI, confidence interval; Ref, Reference; ECOG, Eastern Cooperative Oncology Group; HER2, human epidermal growth factor receptor 2; IHC, immunohistochemistry; ETS, early tumor shrinkage; TTG, time to tumor growth; DpR, depth of response.

**Supplementary Table 6: Multivariable analysis of selected demographic variables with time to tumor growth**

|                            | Progression-free Survival |                |              | Overall Survival        |                |              |
|----------------------------|---------------------------|----------------|--------------|-------------------------|----------------|--------------|
|                            | Adjusted for Covariates   |                |              | Adjusted for Covariates |                |              |
|                            | HR                        | 95% CI         | <i>P</i>     | HR                      | 95% CI         | <i>P</i>     |
| Age                        |                           |                |              |                         |                |              |
| < 65                       | Ref                       |                |              | Ref                     |                |              |
| ≥ 65                       | 1.141                     | 0.477 to 1.611 | 0.672        | 1.336                   | 0.617 to 2.896 | 0.462        |
| ECOG performance status    |                           |                |              |                         |                |              |
| 0                          | Ref                       |                |              | Ref                     |                |              |
| ≥ 1                        | 1.188                     | 0.641 to 2.202 | 0.584        | 1.575                   | 0.719 to 3.451 | 0.256        |
| HER2 overexpression by IHC |                           |                |              |                         |                |              |
| 2+                         | Ref                       |                |              | Ref                     |                |              |
| 3+                         | 0.704                     | 0.370 to 2.342 | 0.287        | 1.801                   | 0.756 to 4.316 | 0.183        |
| TTG                        | 0.998                     | 0.995 to 1.000 | 0.074        | 0.996                   | 0.990 to 1.001 | 0.095        |
| DpR <sup>†</sup>           | 0.823                     | 0.730 to 0.927 | <b>0.001</b> | 0.840                   | 0.731 to 0,965 | <b>0.014</b> |

<sup>†</sup>HR per 10% tumor size decrease.

Abbreviations : HR, hazard ratio; CI, confidence interval; Ref, Reference; ECOG, Eastern Cooperative Oncology Group; HER2, human epidermal growth factor receptor 2; IHC, immunohistochemistry; ETS, early tumor shrinkage; TTG, time to tumor growth; DpR, depth of response.



**Supplementary Table 7: Multivariable analysis of DpR and survival outcomes after adjusting tumor burden**

|                            | Progression-free Survival |                |              | Overall Survival        |                |              |
|----------------------------|---------------------------|----------------|--------------|-------------------------|----------------|--------------|
|                            | Adjusted for Covariates   |                |              | Adjusted for Covariates |                |              |
|                            | HR                        | 95% CI         | <i>P</i>     | HR                      | 95% CI         | <i>P</i>     |
| Age                        |                           |                |              |                         |                |              |
| < 65                       | Ref                       |                |              | Ref                     |                |              |
| ≥ 65                       | 0.739                     | 0.398 to 1.375 | 0.340        | 0.792                   | 0.353 to 1.778 | 0.572        |
| ECOG performance status    |                           |                |              |                         |                |              |
| 0                          | Ref                       |                |              | Ref                     |                |              |
| ≥ 1                        | 1.385                     | 0.759 to 2.528 | 0.288        | 1.882                   | 0.884 to 4.009 | 0.101        |
| HER2 overexpression by IHC |                           |                |              |                         |                |              |
| 2+                         | Ref                       |                |              | Ref                     |                |              |
| 3+                         | 0.601                     | 0.318 to 1.137 | 0.118        | 1.353                   | 0.589 to 3.108 | 0.477        |
| Baseline Sum of LD         | 1.002                     | 0.998 to 1.006 | 0.409        | 1.006                   | 1.001 to 1.011 | <b>0.026</b> |
| DpR <sup>†</sup>           | 0.802                     | 0.710 to 0.906 | <b>0.000</b> | 0.837                   | 0.731 to 0.958 | <b>0.010</b> |

<sup>†</sup>HR per 10% tumor size decrease

Abbreviations : HR, hazard ratio; CI, confidence interval; Ref, Reference; ECOG, Eastern Cooperative Oncology Group; HER2, human epidermal growth factor receptor 2; IHC, immunohistochemistry; LD, long diameters; DpR, depth of response
